# Supplementary material for: Vervets revisited: A quantitative analysis of alarm call structure and context specificity
Source: PubMed Central journal article supplement (PMC4541072; doi:10.1038/srep13220), 2015-08-19
Supplement: srep13220-s1.pdf [file srep13220-s1.pdf]

## Supplementary Information

### Vervets revisited: A quantitative analysis of alarm call structure and context specificity

Tabitha Price<sup>1,2</sup>, Philip Wadewitz<sup>1,3</sup>, Dorothy Cheney<sup>4</sup>, Robert Seyfarth<sup>5</sup>, Kurt Hammerschmidt<sup>1</sup> and Julia Fischer<sup>1,\*</sup>

#### Selection of Acoustic variables

Because a number of the acoustic variables were highly correlating, we first used stepwise discriminant function analysis to reduce the set of variables needed to differentiate between contexts. The selection criterion for an acoustic parameter to be entered was  $F = 3.84$  and  $F = 2.71$  to be removed from the analysis. For females, this yielded a total of 8 variables; for males, an additional 3 variables were needed. As the number of variables may strongly influence the outcome of cluster analyses, and we wanted to keep the analyses of male and female calls as similar as possible, we settled on a final set of 10 variables for both sexes (Tab. S1). Nevertheless, we conducted all analyses for males and females separately.

**Table S1.** Description of Acoustic Variables that were initially calculated and indication of variables selected based on a step-wise discriminant function analysis. Variables shown in bold are used in the cluster and discriminant function analysis.

| Acoustic Variable                 | Description                                                   | Extracted for females | Extracted for males |
|-----------------------------------|---------------------------------------------------------------|-----------------------|---------------------|
| <u>Temporal call measures</u>     |                                                               |                       |                     |
| Call duration (ms)                | Duration of call                                              |                       |                     |
| <b>Number of elements</b>         | Number of call elements within a call                         | X                     | X                   |
| Inter-element interval (ms)       | Mean inter-element interval within a call                     |                       |                     |
| <u>Element measures</u>           |                                                               |                       |                     |
| <b>Element duration (ms)</b>      | Duration of call element                                      | X                     | X                   |
| <b>Peak frequency (Hz)</b>        | Mean peak frequency                                           | X                     | X                   |
| <b>PF jump (Hz)</b>               | Maximum difference between successive peak frequencies        |                       | X                   |
| PF linear trend (-1 to 1)         | Factor of linear trend of peak frequency throughout the call  |                       |                     |
| PF deviation (Hz)                 | Mean deviation between peak frequency and linear trend        |                       |                     |
| <b>First quartile (Hz)</b>        | Mean first quartile of amplitude in spectrum                  | X                     | X                   |
| <b>Second quartile (Hz)</b>       | Mean second quartile of amplitude in spectrum                 |                       | X                   |
| <b>FP1 mean (Hz)</b>              | Mean frequency of the first global frequency peak             | X                     | X                   |
| <b>FP1A mean (rel. amplitude)</b> | Mean amplitude of the first global frequency peak             | X                     | X                   |
| Dominant frequency (Hz)           | Mean dominant frequency                                       |                       | X                   |
| <b>Frequency range (Hz)</b>       | Mean frequency range                                          | X                     | X                   |
| <b>Wiener Entropy</b>             | Mean value of noise within call. 0=pure tone, 1= random noise | X                     | X                   |
| <u>Average element measures</u>   |                                                               |                       |                     |
| Mean second quartile (Hz)         | see above – across all elements in call                       |                       |                     |
| Mean element duration (ms)        | see above – across all elements in call                       |                       |                     |
| Mean peak frequency (Hz)          | see above – across all elements in call                       |                       |                     |

**Table S2.** Descriptive statistics (mean and SEM) for the four clusters identified for female calls.

| Acoustic Variable  | Cluster Number |      |       |      |      |      |      |      |
|--------------------|----------------|------|-------|------|------|------|------|------|
|                    | 1              |      | 2     |      | 3    |      | 4    |      |
|                    | Mean           | SEM  | Mean  | SEM  | Mean | SEM  | Mean | SEM  |
| Number of elements | 4.13           | 0.19 | 1.43  | 0.06 | 4.07 | 0.17 | 3.47 | 0.17 |
| Element duration   | 38.4           | 1.1  | 108.5 | 2.3  | 38.5 | 0.7  | 42.8 | 1.5  |
| Wiener Entropy     | 0.78           | 0.01 | 0.61  | 0.01 | 0.69 | 0.01 | 0.51 | 0.01 |
| Peak frequency     | 3137           | 149  | 2367  | 31   | 1298 | 40   | 953  | 37   |
| First quartile     | 2601           | 65   | 2220  | 25   | 1574 | 24   | 1009 | 24   |
| Second quartile    | 4712           | 89   | 2964  | 36   | 3166 | 50   | 1704 | 40   |
| PF jump            | 3926           | 231  | 1045  | 60   | 1228 | 89   | 721  | 55   |
| Frequency range    | 8883           | 145  | 4051  | 78   | 7075 | 116  | 3407 | 103  |
| FP1 mean           | 2045           | 105  | 2193  | 33   | 1065 | 39   | 853  | 39   |
| FP1A mean          | 380            | 15   | 1248  | 28   | 516  | 12   | 672  | 22   |

**Table S3.** Distribution of female calls recorded in the different contexts across the four clusters identified by the 2-step cluster analysis.

| context      | Cluster Number |           |           |                   | Total |     |
|--------------|----------------|-----------|-----------|-------------------|-------|-----|
|              | 1 „chutter“    | 2 „chirp“ | 3 „rraup“ | 4 „chutter-rraup“ |       |     |
| Agg. between |                | 62        | 0         | 105               | 49    | 216 |
| Agg. within  |                | 6         | 0         | 32                | 15    | 53  |
| Eagle        |                | 0         | 0         | 6                 | 32    | 38  |
| Snake        |                | 24        | 1         | 8                 | 0     | 33  |
| Terrestrial  |                | 3         | 160       | 1                 | 0     | 164 |
| Total        |                | 95        | 161       | 152               | 96    | 504 |

**Table S4.** Descriptive statistics (mean and SEM) for the three clusters identified for male calls.

| Acoustic Variable  | Cluster Number |      |       |      |      |      |
|--------------------|----------------|------|-------|------|------|------|
|                    | 1              |      | 2     |      | 3    |      |
|                    | Mean           | SEM  | Mean  | SEM  | Mean | SEM  |
| Number of elements | 6.21           | 0.79 | 3.05  | 0.17 | 4.17 | 0.42 |
| Element duration   | 46.4           | 4.8  | 112.2 | 2.1  | 81.3 | 3.6  |
| Wiener Entropy     | 0.62           | 0.02 | 0.60  | 0.00 | 0.43 | 0.01 |
| Peak frequency     | 1943           | 168  | 1909  | 20   | 1195 | 69   |
| First quartile     | 1772           | 104  | 1753  | 18   | 1015 | 43   |
| Second quartile    | 2825           | 121  | 2394  | 23   | 1493 | 47   |
| PF jump            | 1924           | 174  | 633   | 33   | 787  | 132  |
| Frequency range    | 5205           | 276  | 3799  | 44   | 2255 | 114  |
| FP1 mean           | 1293           | 143  | 1784  | 26   | 1140 | 74   |
| FP1A mean          | 435            | 29   | 817   | 14   | 1240 | 55   |

**Table S5.** Distribution of male calls recorded in the different contexts across the three clusters identified by the 2-step cluster analysis.

|            |             | Cluster Number |          |           | Total |
|------------|-------------|----------------|----------|-----------|-------|
|            |             | 1 „chutter“    | 2 „bark“ | 3 „rraup“ |       |
| Subcontext | Eagle       | 0              | 0        | 21        | 21    |
|            | Snake       | 20             | 3        | 18        | 41    |
|            | Terrestrial | 4              | 168      | 3         | 175   |
| Total      |             | 24             | 171      | 42        | 237   |

**Table S6.** Classification Results of the discriminant function analysis for female alarm calls.

|       | <u>Context</u> | <u>Predicted Group Membership</u> |       |             | <u>Total</u> |
|-------|----------------|-----------------------------------|-------|-------------|--------------|
|       |                | Eagle                             | Snake | Terrestrial |              |
| Count | Eagle          | 37                                | 1     | 0           | 38           |
|       | Snake          | 1                                 | 32    | 0           | 33           |
|       | Terrestrial    | 0                                 | 1     | 163         | 164          |
| %     | Eagle          | 97.4                              | 2.6   | .0          | 100.0        |
|       | Snake          | 3.0                               | 97.0  | .0          | 100.0        |
|       | Terrestrial    | .0                                | .6    | 99.4        | 100.0        |
